# Supplementary material
Source: bioRxiv or medRxiv preprint supplement (https://www.biorxiv.org/highwire/filestream/91145/field_highwire_adjunct_files/0/291088-1.pdf)
Supplement: Supplementary file [file 291088-1.pdf]

## Supporting Information

Intracellular signaling through the *comRS* system in *Streptococcus mutans* genetic competence

Simon A.M. Underhill, Robert C. Shields, Justin R. Kaspar, Momin Haider, Robert A. Burne and Stephen J. Hagen\*

List of supporting figures and tables:

- Figure S1: Response of cocultures is time-independent
- Figure S2: Effect of histidine tag on ComR binding of ComS and XIP
- Deterministic fit: Equation system and calculated parameter values
- Table S1: Parameters for gamma distribution fits to single cell *P<sub>comX</sub>* GFP fluorescence distributions in microfluidic experiments
- Table S2: Fitted values for the 12 parameters of the model and statistical measurement of their robustness from bootstrap process
- Table S3: RT-qPCR primer sequences

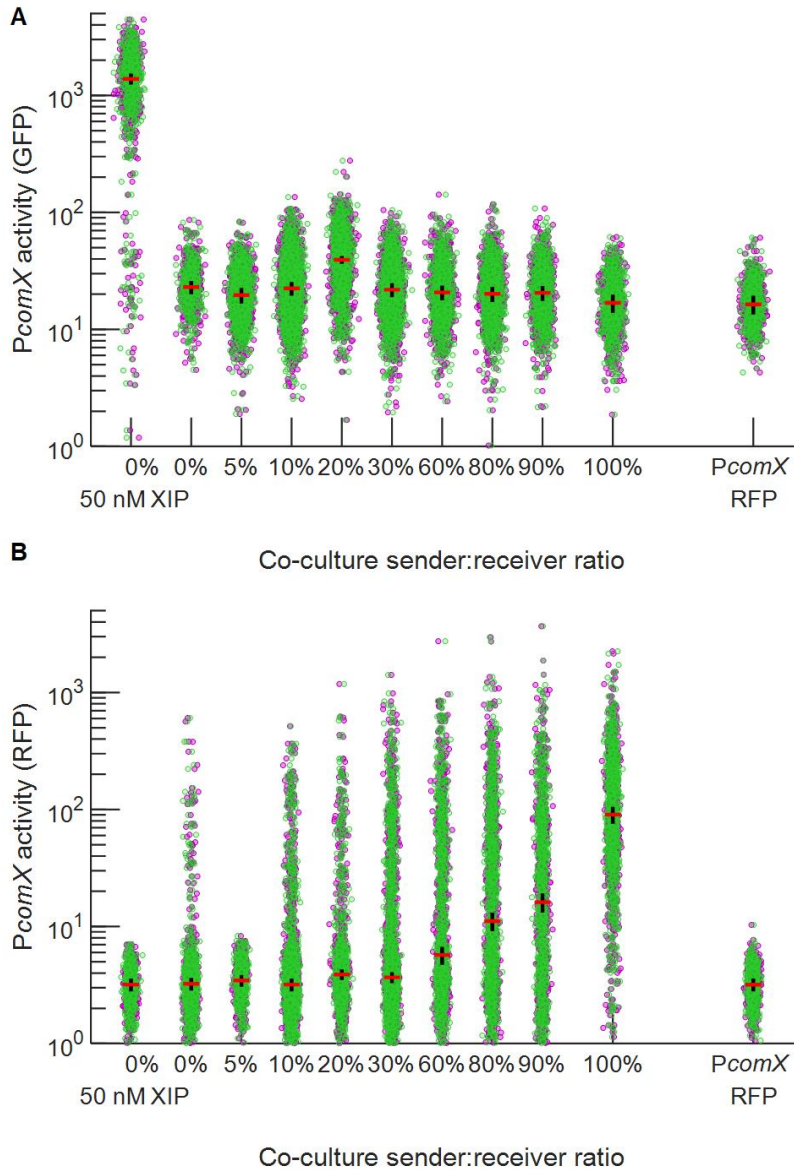

18

19 **Figure S1 – Response of cocultures is time-independent**

20 (A) GFP (*comX* reporter) and (B) RFP (*comY*) fluorescence of individual cells in co-  
 21 cultures of sender (184*comS* *PcomX-rfp*) and receiver (*PcomX-gfp*  $\Delta$ *comS*) strains of *S.*  
 22 *mutans*. Samples are labeled by percentage by volume of 184*comS* (sender) culture in  
 23 the initial preparation of the coculture. Fluorescence was measured immediately (0 h,  
 24 green) after mixing, or 4 h (magenta) after mixing the coculture. The red horizontal bars

25 show the median fluorescence immediately after mixing (0 h); the black vertical bars

26 show the median at 4 h. Data are from the coculture experiment of Figure 4.

27

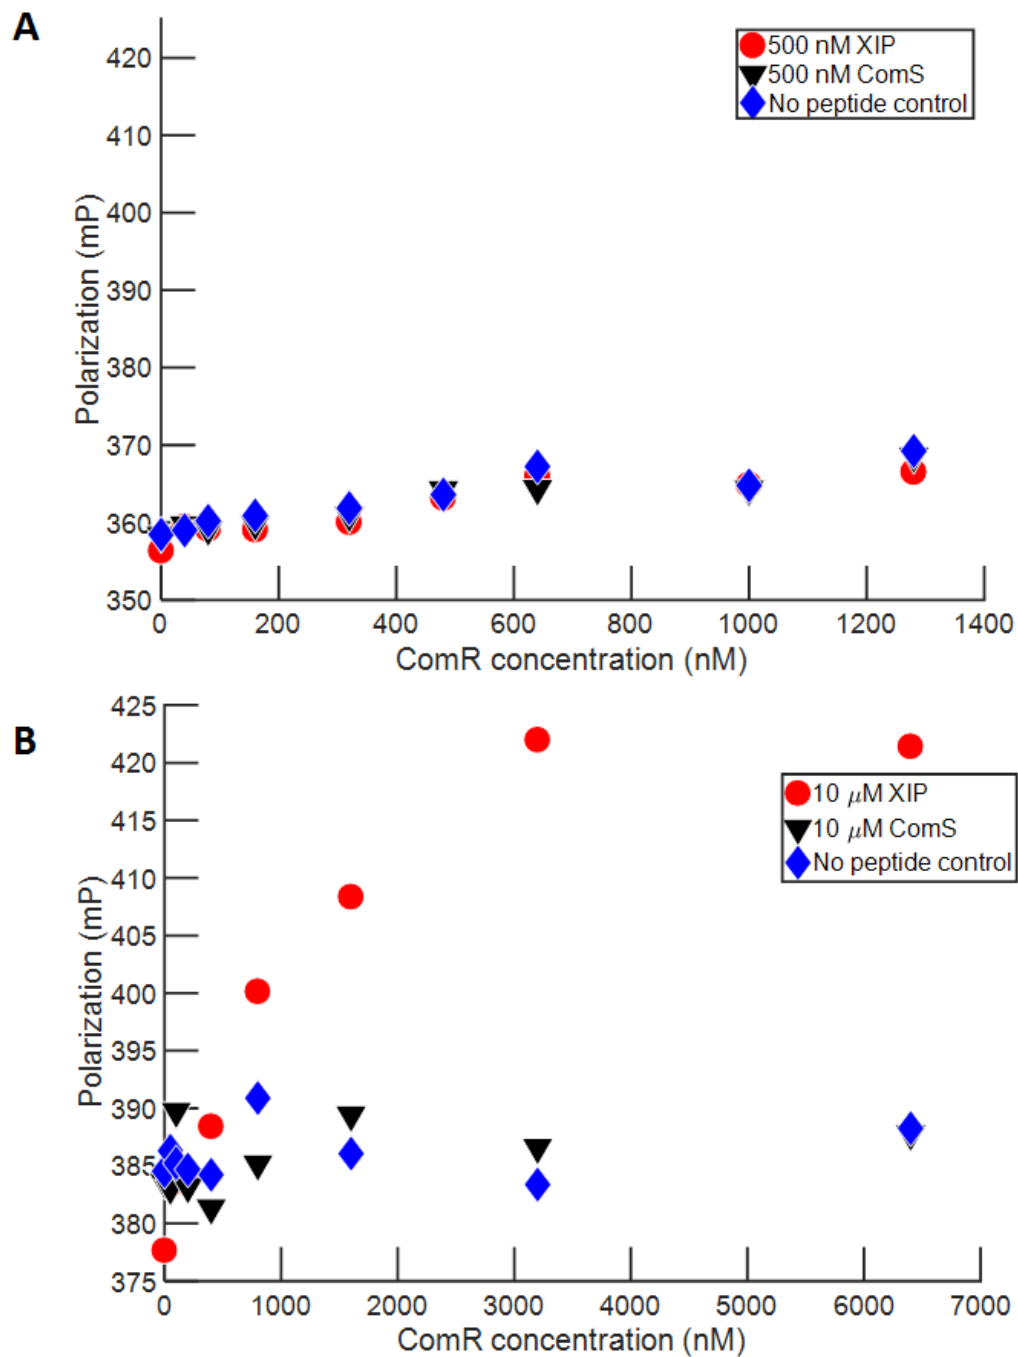

28

29 **Figure S2: Effect of histidine tag on ComR binding of ComS and XIP**

30 Fluorescence polarization study of ComS and XIP interaction with ComR that was N- or  
 31 C-terminally tagged with 6X-histidine. Polarization is plotted versus [ComR] for (A) C-  
 32 terminally tagged ComR and (B) N-terminally tagged ComR. In each case 1 nM

33 fluorescent DNA and 0.05 mg ml<sup>-1</sup> salmon DNA were present along with no signal  
 34 peptides (black), XIP (blue) or ComS (green).

35

36 **Deterministic fit: Equation system and calculated parameter values**

37 The system of ODEs used to fit microfluidic data is given below. X represents ComX, Z  
 38 the internal XIP concentration, S the internal ComS concentration, R the (constant)  
 39 ComR concentration and Exo the exogenous XIP level. All units are in nM and seconds  
 40 where appropriate. Other symbols are parameters describing the reaction kinetics. A  
 41 star indicates one of the V parameters contributing to feedback, while unstarred Vs  
 42 indicate a maximum rate of production of ComX. Hill kinetics corresponding to inferred  
 43 cooperativity from FP assays were used. Calculated parameters are given in Table S2.  
 44 A 200-iteration bootstrap analysis of the data was performed in order to estimate  
 45 parameter robustness, with the 10<sup>th</sup> and 90<sup>th</sup> percentiles of parameter values reported.  
 46 These percentile values demonstrate preservation of the relative order of magnitude  
 47 between dissociation constants for XIP-ComR and ComS-ComR.

48 
$$\frac{dX}{dt} = \frac{V_1 R^2 Z^2}{R^2 Z^2 + K_X^4} + \frac{V_2 RS}{RS + K_S^2} - \beta_X X \quad (1)$$

49 
$$\frac{dS}{dt} = \alpha_0 - \beta_S S - \gamma S + \frac{V_1^* R^2 Z^2}{R^2 Z^2 + K_X^4} + \frac{V_2^* RS}{RS + K_S^2} - \frac{V_2 RS}{RS + K_S^2} \quad (2)$$

50 
$$\frac{dZ}{dt} = J(Exo - Z) - \beta_Z Z + \gamma S - \frac{V_1 R^2 Z^2}{R^2 Z^2 + K_X^4} - \frac{V_1^* R^2 Z^2}{R^2 Z^2 + K_X^4} \quad (3)$$

51

52

53

54 **Table S1: Parameters for gamma distribution fits to single cell *PcomX* GFP**  
 55 **fluorescence distributions in microfluidic experiments.**

| [XIP]                           | <i>a</i> | <i>b</i> |
|---------------------------------|----------|----------|
| <b>Wild type</b>                | -        | -        |
| 0                               | 4.09     | 5.51     |
| 280                             | 5.50     | 172      |
| 700                             | 9.62     | 153      |
| 1840                            | 11.0     | 184      |
| 3250                            | 12.5     | 168      |
| 5230                            | 12.4     | 174      |
| 6000                            | 11.7     | 172      |
| <b><math>\Delta comS</math></b> | -        | -        |
| 0                               | 6.14     | 2.29     |
| 30                              | 7.10     | 2.44     |
| 850                             | 4.24     | 166      |
| 940                             | 5.11     | 148      |
| 3000                            | 7.44     | 160      |
| 4020                            | 7.61     | 172      |
| 6000                            | 7.45     | 180      |

56

57

58 **Table S2: Fitted values for the 12 parameters of the model and statistical**  
 59 **measurement of their robustness from bootstrap process.**

| Parameter  | Best fit value –<br>used for Fig. 7 | 10 <sup>th</sup><br>percentile<br>from<br>bootstrap | 90 <sup>th</sup><br>percentile<br>from<br>bootstrap | Units              |
|------------|-------------------------------------|-----------------------------------------------------|-----------------------------------------------------|--------------------|
| $\alpha_0$ | 7.85                                | 1.78                                                | 19.1                                                | nM s <sup>-1</sup> |
| $\beta_S$  | $7.17 \times 10^{-3}$               | $7.97 \times 10^{-4}$                               | $1.32 \times 10^{-2}$                               | s <sup>-1</sup>    |
| $\gamma$   | 0.452                               | 0.227                                               | 2.74                                                | s <sup>-1</sup>    |
| $V_1^*$    | $1.07 \times 10^4$                  | $3.8 \times 10^3$                                   | $2.46 \times 10^4$                                  | nM s <sup>-1</sup> |
| $V_2^*$    | $1.33 \times 10^4$                  | $3.22 \times 10^3$                                  | $2.65 \times 10^4$                                  | nM s <sup>-1</sup> |
| $K_x$      | 148                                 | 42                                                  | 210                                                 | nM                 |
| $K_S$      | 2740                                | 849                                                 | 3000                                                | nM                 |
| $V_1$      | 3.55                                | 0.988                                               | 558                                                 | nM s <sup>-1</sup> |
| $V_2$      | 778                                 | 309                                                 | 2190                                                | s <sup>-1</sup>    |
| $J$        | 9.39                                | $6.14 \times 10^{-2}$                               | 17.6                                                | s <sup>-1</sup>    |
| $\beta_Z$  | 1.28                                | 0.264                                               | 3.07                                                | nM s <sup>-1</sup> |
| $\beta_X$  | 10.5                                | 1.71                                                | 16.2                                                | s <sup>-1</sup>    |

60

61

62 **Table S3: RT-qPCR primer sequences**

| Gene and direction  | Primer sequence               |
|---------------------|-------------------------------|
| <i>comX</i> forward | 5'-CGTCAGCAAGAAAGTCAGAAA C-3' |
| <i>comX</i> reverse | 5'-ATACCGCCACTTGACAAACAG-3'   |
| <i>comS</i> forward | 5'-TCAAAAAGAAAGGAGAATAACA-3'  |
| <i>comS</i> reverse | 5'-TCATCTGAGATAAGGGCTGT-3'    |
| 16S rRNA forward    | 5'-CACACCGCCCGTCACACC-3'      |
| 16S rRNA reverse    | 5'-CAGCCGCACCTTCCGATACG-3'    |

63
